# Supplementary material for: Direct Recycling of End-of-Life Lithium-Ion Batteries Cathode Active Materials by Hydrothermal Route
Source: Research Square preprint supplement (doi:10.21203/rs.3.rs-8074318/v1), 2025-12-11
Supplement: Supplementary file 1 [file 2798b22c4b83e8347199cdc8.docx]

# Supplementary Material


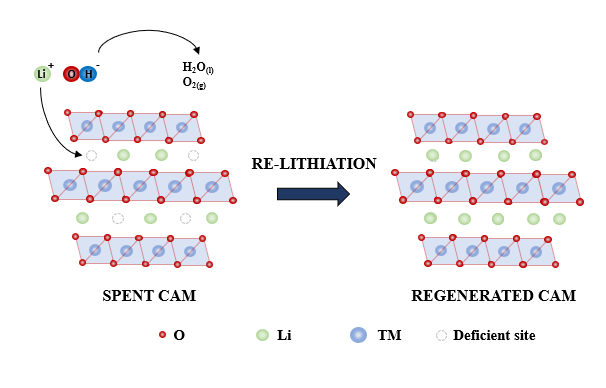


**Figure S1.** Illustration of the re-lithiation reaction mechanism.


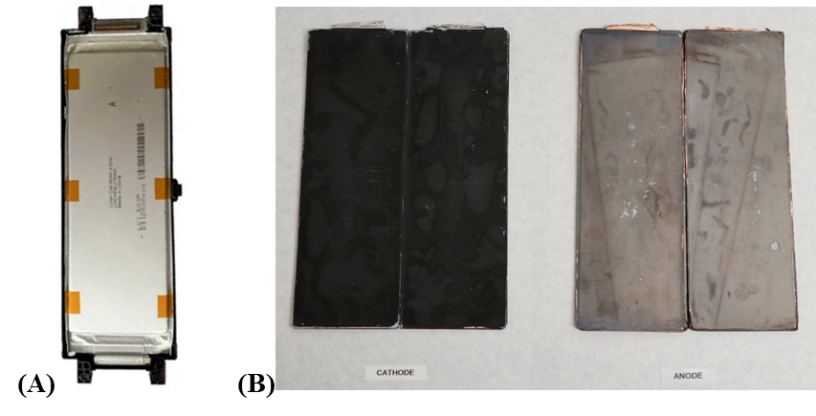


**Figure S2.** **(A)** LG Chem E63B cell; **(B)** Cathode and anode foils after manual disassembling. Source: Photo by the author.

**Table S1.** Experimental conditions for the hydrothermal tests.

| **Test** | **LiOH Concentration (M)** | **Temperature (°C)** | **Time (h)** |
| --- | --- | --- | --- |
| **1** | 4.0 | 160 | 2 |
| **2** | 4.0 | 160 | 1 |
| **3** | 4.0 | 220 | 2 |
| **4** | 4.0 | 220 | 1 |
| **5** | 2.0 | 160 | 2 |
| **6** | 2.0 | 160 | 1 |
| **7** | 2.0 | 220 | 2 |
| **8** | 2.0 | 220 | 1 |
| **9** | 0.5 | 160 | 2 |
| **10** | 0.5 | 160 | 1 |
| **11** | 0.5 | 220 | 2 |
| **12** | 0.5 | 220 | 1 |





**Figure S3.** XRD results of the spent CAM and (simulated) diffraction pattern of the α-NaFeO2 structure.


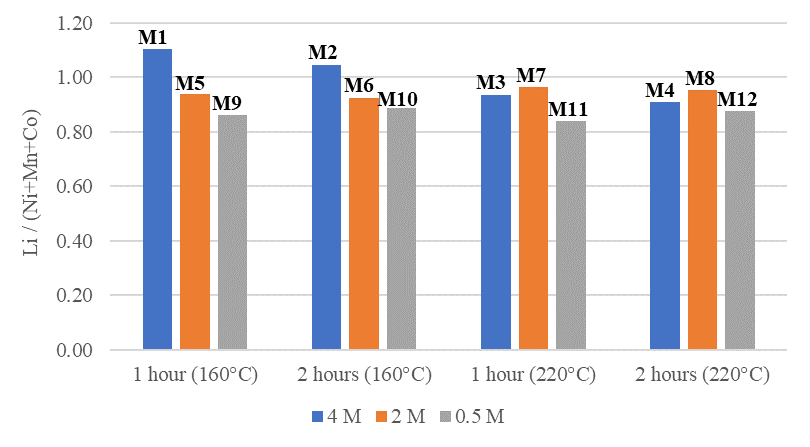


**Figure S4.** Composition of the regenerated cathode material.


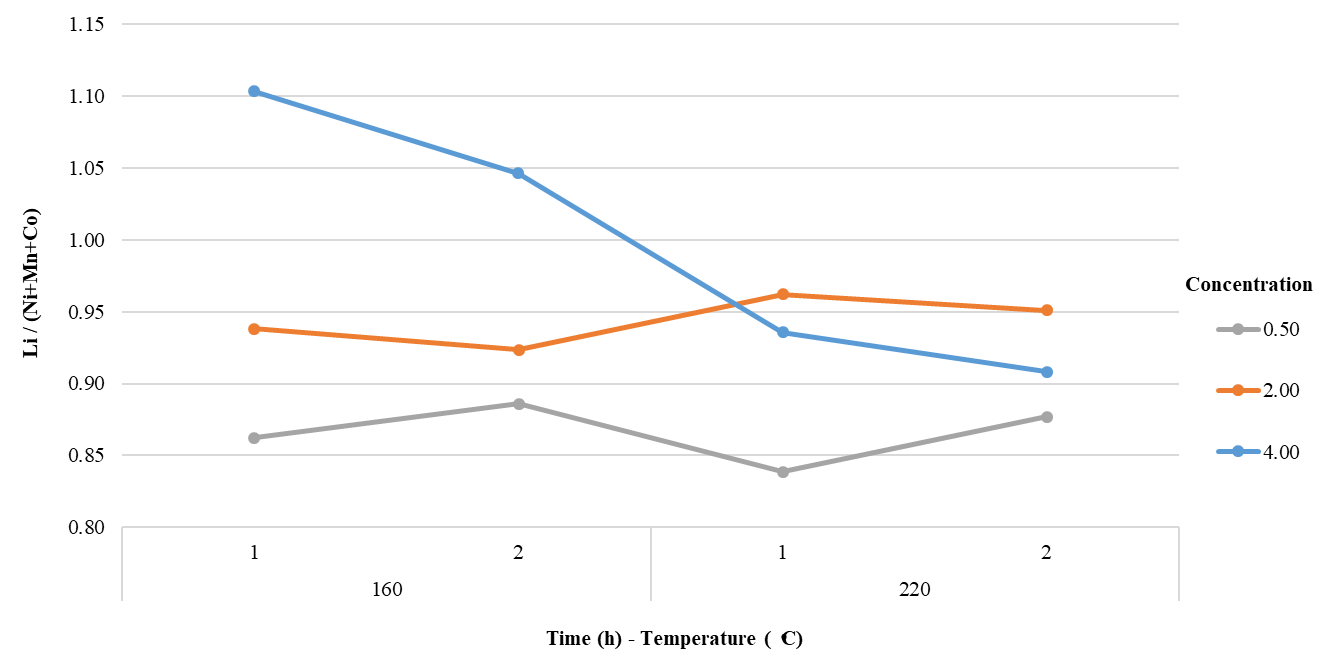


**Figure S5**. Interaction effect between concentration - temperature and time
